# Supplementary material for: Contribution of BH3-domain and Transmembrane-domain to the Activity and Interaction of the Pore-forming Bcl-2 Proteins Bok, Bak, and Bax
Source: Sci Rep. 2018 Aug 20;8:12434. doi: 10.1038/s41598-018-30603-6 (PMC6102298; doi:10.1038/s41598-018-30603-6)
Supplement: Supplementary file 1 — Supplementary Figures S1-4 [file 41598_2018_30603_MOESM1_ESM.pdf]

# **Contribution of BH3-domain and Transmembrane-domain to the Activity and Interaction of the Pore-forming Bcl-2 Proteins Bok, Bak, and Bax**

Daniel Stehle<sup>1</sup>, Melanie Grimm<sup>1</sup>, Stephanie Einsele-Scholz<sup>1</sup>, Friederike Ladwig<sup>2</sup>, Janina Johanning<sup>3</sup>, Gerd Fischer<sup>1</sup>, Bernhard Gillissen<sup>4</sup>, Klaus Schulze-Osthoff<sup>1,5</sup>, and Frank Essmann<sup>1,\*</sup>.

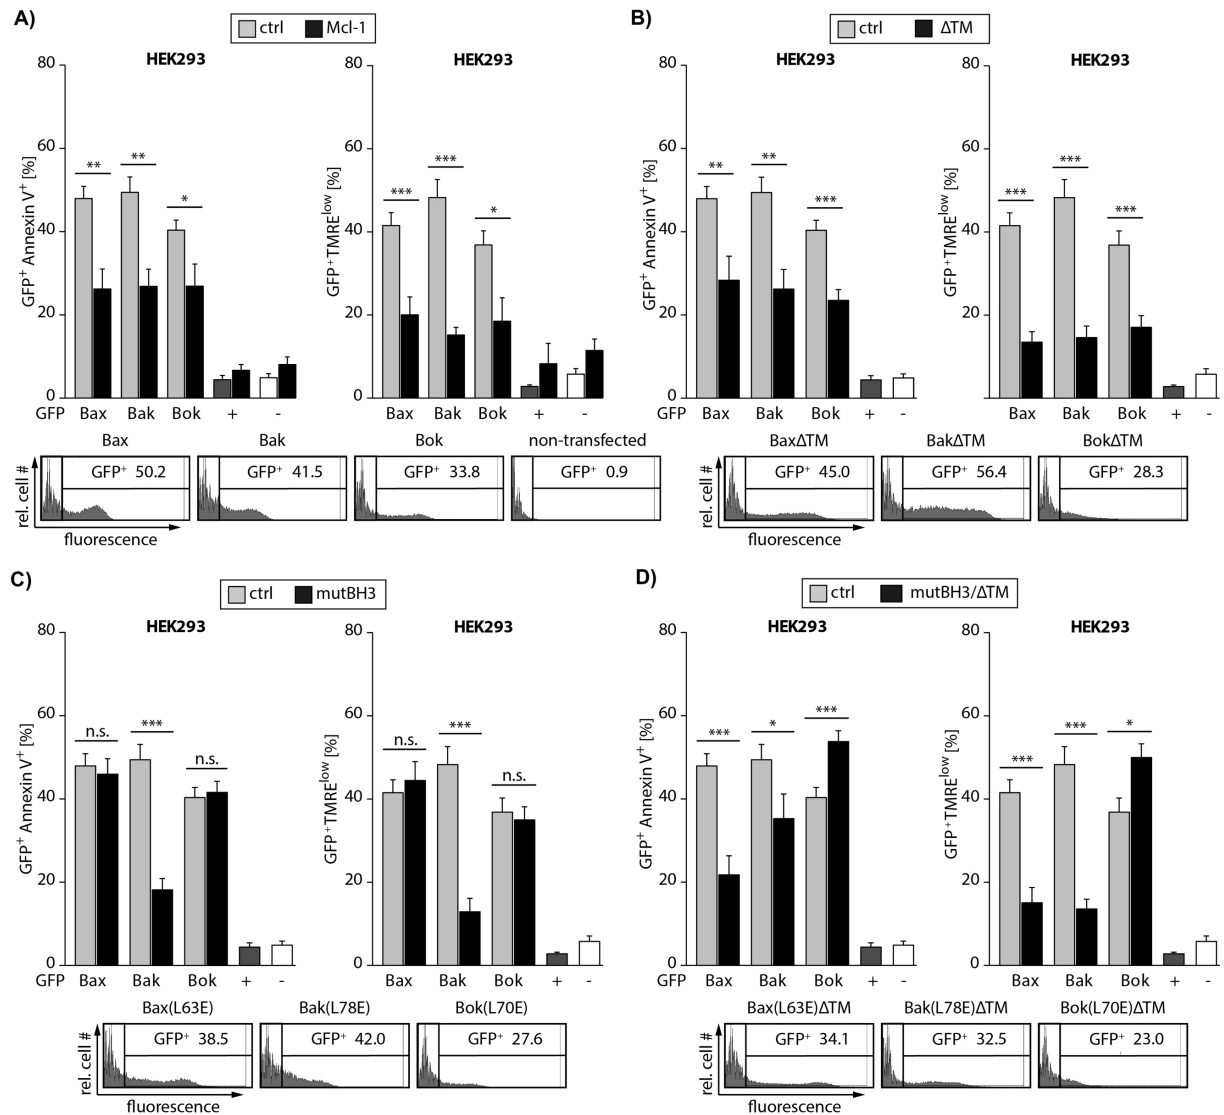

**Supplemental Figure S1:** In HEK293 cells apoptosis induction (Annexin-V<sup>+</sup>, left panels) and loss of  $\Delta\Psi_m$  (TMRE<sup>low</sup>, right panels) by GFP-Bax, -Bak and -Bok is reduced by A) co-expression of Mcl-1, and B) deletion of the transmembrane-domain ( $\Delta$ TM). C) Mutation of the BH3-domain exclusively diminishes cell death and loss of  $\Delta\Psi_m$  induced by GFP-Bak(L78E) but has no impact on GFP-Bax(L63E) and GFP-Bok(L70E). D) Simultaneous deletion of the TM-domain and mutation of the BH3-domain results in a reduced proportion of apoptotic cells (left panel) and cells with low TMRE-staining in case of Bax(L63E) $\Delta$ TM and Bak(L78E) $\Delta$ TM whereas Bok(L70E) $\Delta$ TM induced apoptosis is enhanced. Representative histograms below bar graphs show relative cell number and relative GFP-fluorescence intensity 18h post transfection. The proportion of GFP<sup>+</sup> gated cells is given in %.

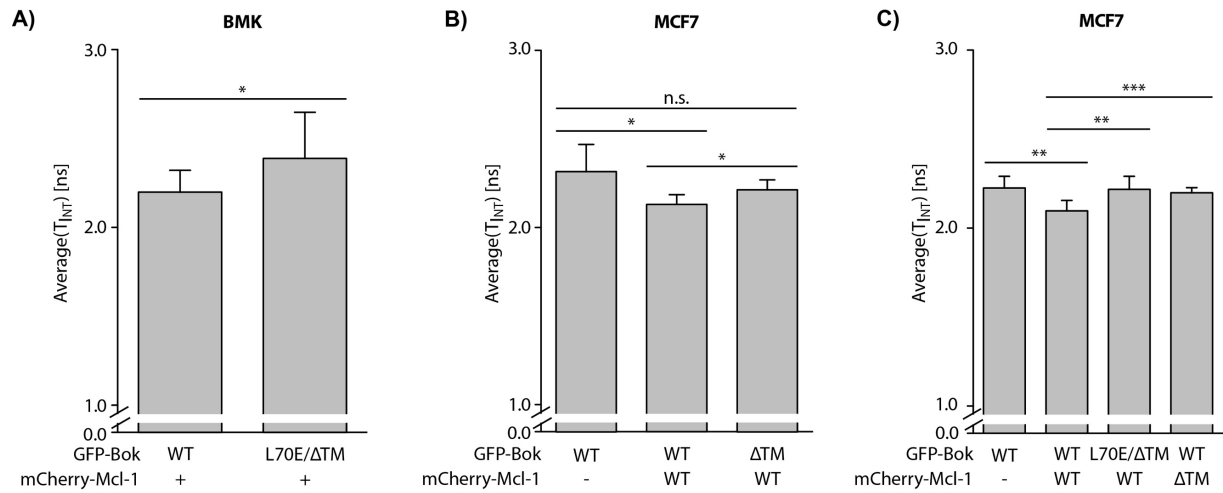

**Supplemental Figure S2:** A) FRET/FLIM analysis of Bax&Bak deficient BMK cells expressing mCherry-Mcl-1 reveals longer fluorescence lifetime of GFP-Bok(L70E) $\Delta$ TM as compared to GFP-Bok indicating reduced/lost interaction of GFP-Bok(L70E) $\Delta$ TM with mCherry-Mcl-1 as compared to GFP-Bok. B) Direct comparison of fluorescence lifetime of GFP-Bok alone with that of GFP-Bok and GFP-Bok $\Delta$ TM in the presence of mCherry-Mcl-1 shows reduced lifetime in the presence but not in the absence of the Bok TM-domain. C) Fluorescence lifetime of GFP-Bok is reduced by co-expression of mCherry-Mcl-1. The fluorescence lifetime of GFP-Bok(L70E) $\Delta$ TM is not reduced by co-expression of mCherry-Mcl-1. Also, co-expression of mCherry-Mcl-1 $\Delta$ TM does not induce a reduction in the fluorescence lifetime of GFP-Bok.

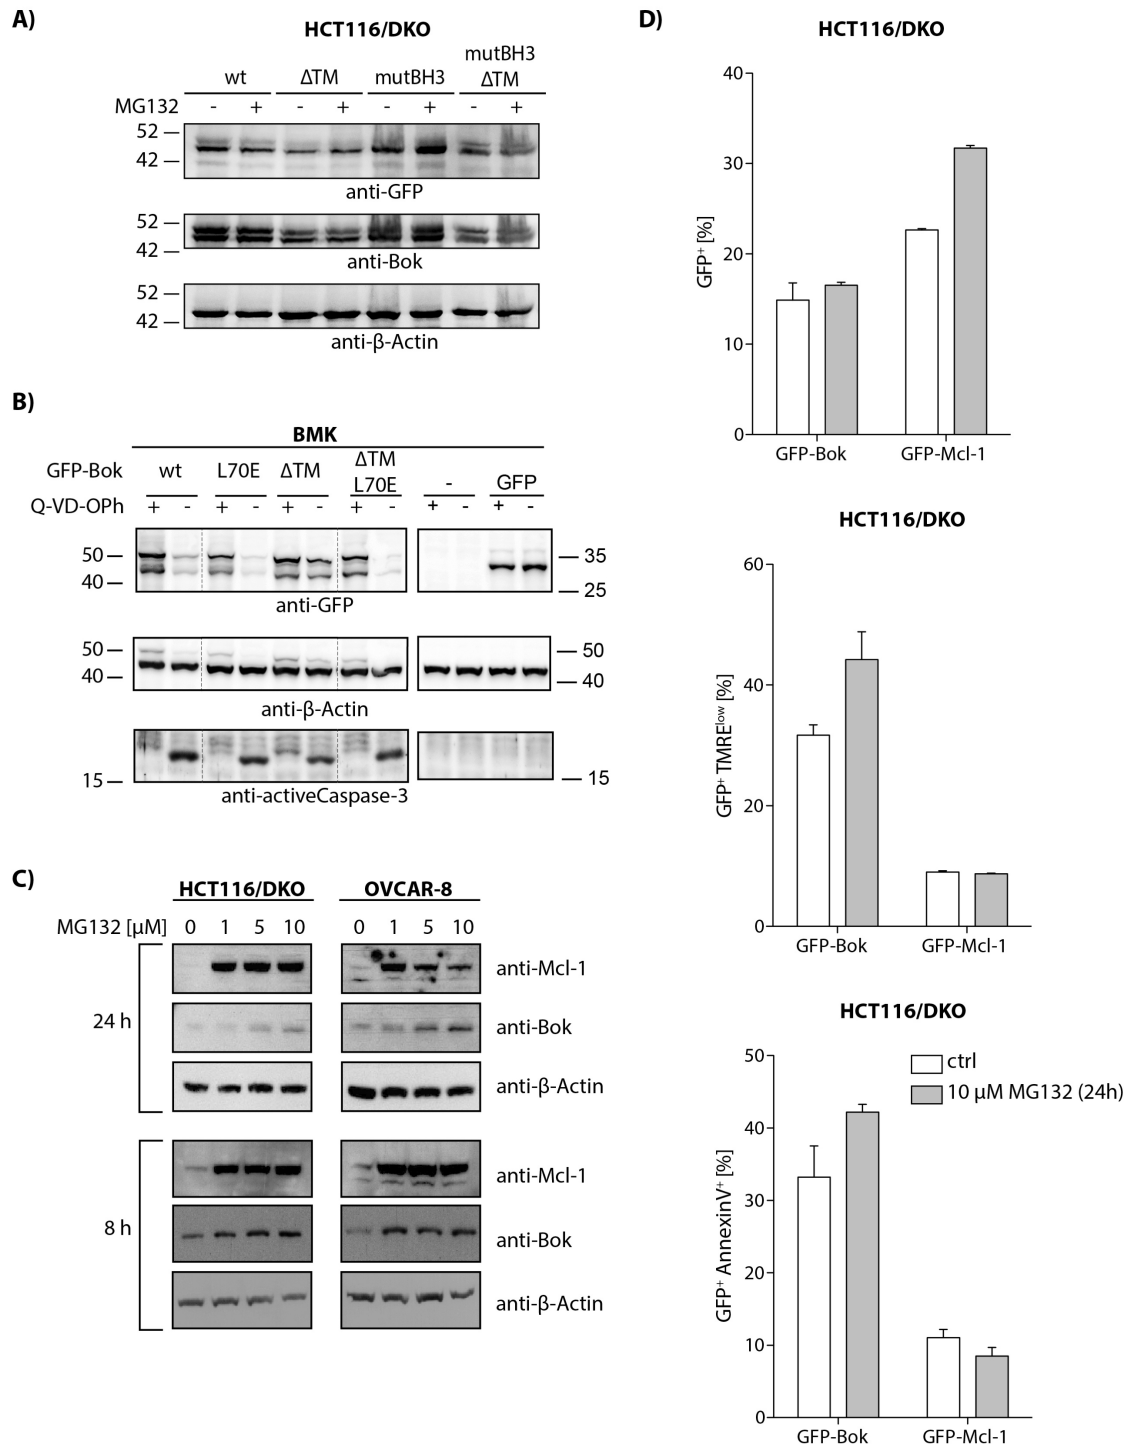

**Supplemental Figure S3:** A) Anti-GFP and anti-Bok Western blot analyses of HCT116/DKO cells transfected with vectors for the expression of GFP-Bok, GFP-Bok $\Delta$ TM, GFP-Bok(L70E) or GFP-Bok(L70E) $\Delta$ TM cultured in the presence or absence of 10  $\mu$ M MG132 shows only slight stabilization of GFP-fused Bok-variants by MG132. B) Bax&Bak deficient BMK cells were transfected with expression vectors for the indicated GFP-Bok fusion proteins in the presence or absence of 10  $\mu$ M Q-VD-Oph. Western blot analyses reveal that the pro-apoptotic activity of Bok-variants correlates with

detection of the active caspase-3 subunit. Inhibition of apoptosis by Q-VD-OPh results in enhanced expression levels of Bok variants which is most pronounced for highly pro-apoptotic forms like GFP-Bok(L70E) $\Delta$ TM and only weakly visible for GFP-Bok $\Delta$ TM. C) Western blot analysis of HCT116/DKO cells incubated in the presence or absence of various concentrations of MG132. Mcl-1 is significantly stabilized after 8 h and 24 h whereas the expression level of endogenous Bok is only slightly enhanced by MG132. D) Flow cytometric analysis of GFP-expression, PS-exposure and loss of  $\Delta\Psi_m$  in HCT116/DKO cells transfected with vectors for the expression of GFP-Bok or GFP-Mcl-1 reveals stabilization of GFP-Mcl-1 by MG132 whereas MG132 mediates only marginal enhanced number of GFP-Bok expressing cells (upper panel). In GFP-Bok transfected cells the number of GFP<sup>+</sup>/TMRE<sup>low</sup> (middle panel) and GFP<sup>+</sup>/Annexin V<sup>+</sup> (lower panel) cells is considerably enhanced by MG132 while cell death is not enhanced in GFP-Mcl-1 expressing cells.

**A)**

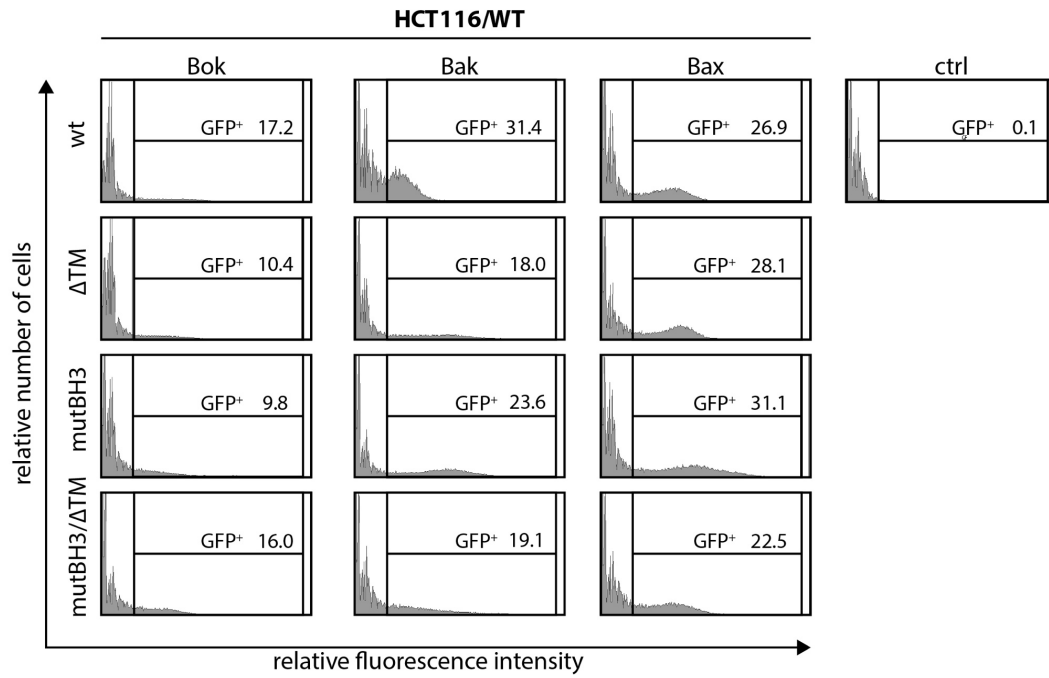

**B)**

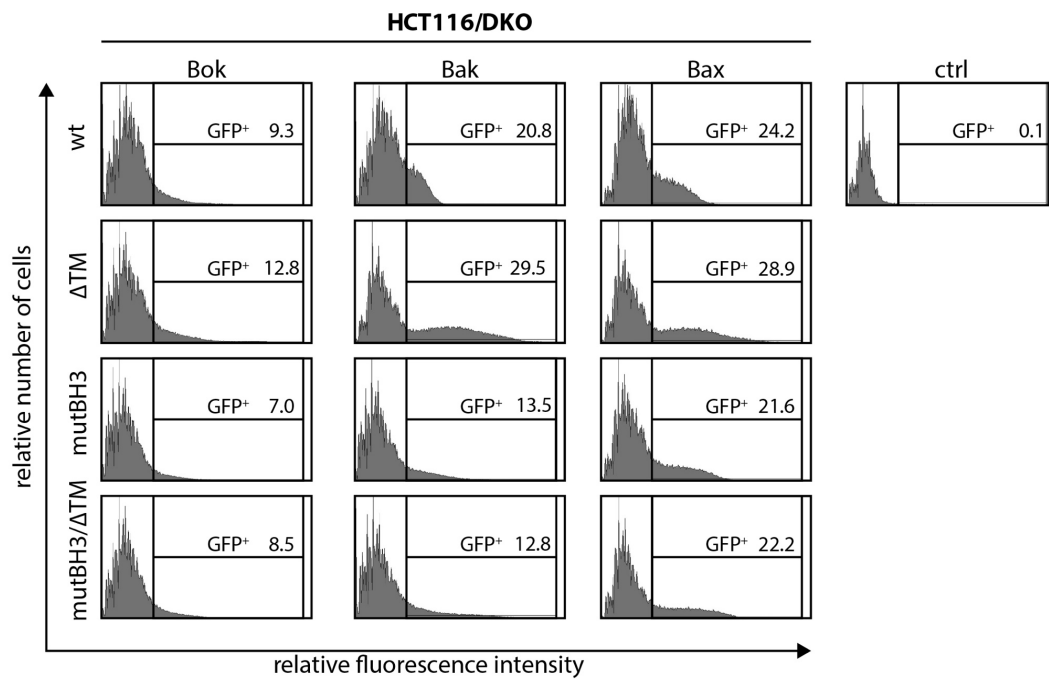

**C)**

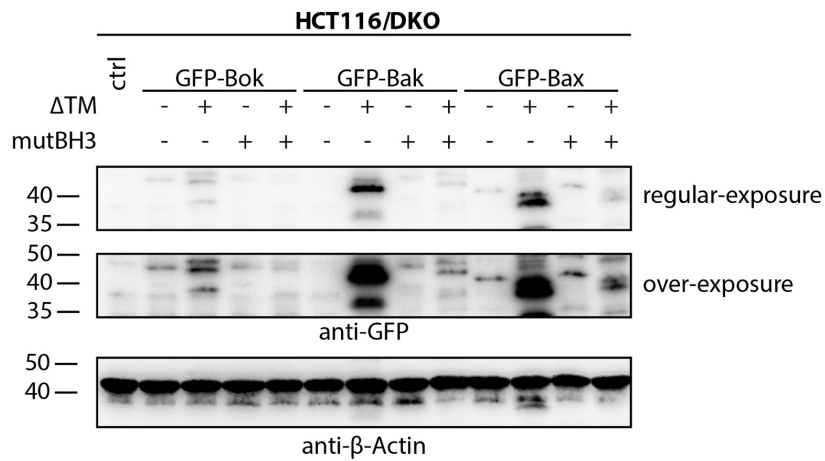

**Supplemental Figure S4:** A and B) Histograms showing the gating of GFP<sup>+</sup> (%) HCT116/WT and HCT116/DKO cells after transfection with vectors for the expression of the indicated GFP-fusion proteins Bok (left), Bak (middle) or Bax (right) either WT (top) or with deleted transmembrane domain ( $\Delta$ TM; 2<sup>nd</sup> row), mutation of the BH3-domain (mutBH3; 3<sup>rd</sup> row) or combination of both (mutBH3/ $\Delta$ TM; bottom). C) Anti-GFP Western blot analysis of HCT116/DKO shown in B. Band intensity reflects the overall result from transfection efficiency in combination with expression level in individual cells.
